# Supplementary material
Source: PubMed Central journal article supplement (PMC5805970)
Supplement: rsif20170696supp3.pdf [file rsif20170696supp3.pdf]

# Risk ratios for contagious outcomes: Simulation code

*Olga Morozova, Ted Cohen, Forrest W. Crawford*

J. R. Soc. Interface

In this document we provide the code that allows replication of the simulation results presented in the paper and in the Supplement. Every piece of code presented below calls a function from the source file 'simulation\_functions.R', which implements one simulation for  $\beta=0$  and  $\gamma=0$  for the set of other parameters used to produce a given figure in the paper and the Supplement. The actual figures were produced by using the same functions for a range of  $\beta$  and  $\gamma$  between -5 and 5 with a step of 0.2. Details regarding the number of simulations per combination of parameters that were used to produce the figures are provided in the Supplement.

```
source('simulation_functions.R')
```

## Figures presented in the section 'Simulation results' of the paper

**Figure 4: Corresponds to Supplement Figure 3 (see below).**

Constant cluster size (4 subjects in each cluster), constant observation time, no infections at baseline, block randomized distribution of covariate  $x$  with  $k=1$ ,  $k=2$  and  $k=3$ .

**Figure 5: Corresponds to Supplement Figure 5 (see below).**

Constant cluster size (4 subjects in each cluster), constant observation time, no infections at baseline, cluster randomized distribution of covariate  $x$  with  $p=0.25$ ,  $p=0.5$ ,  $p=0.75$

**Figure 6: Corresponds to Supplement Figure 6 (see below).**

Variable cluster size (Poisson distributed), constant observation time, no infections at baseline, block randomized distribution of covariate  $x$  with  $k=1$ .

**Figure 7: Corresponds to Supplement Figure 7 (see below).**

Variable cluster size (Poisson distributed), constant observation time, no infections at baseline, block randomized distribution of covariate  $x$  with half of subjects per cluster having  $x=1$ .

## Figures presented in the Supplement

### 4.2.1. Distribution of covariate $x$ when cluster size is constant

**Supplement Figure 3: Constant cluster size (4 subjects in each cluster), constant observation time, no infections at baseline, block randomized distribution of covariate  $x$  with  $k=1$ ,  $k=2$  and  $k=3$  (corresponds to Figure 4 in the paper).**

```
res<-sim.nc.clusters.ef3(nc=500,hh_size=4,tx_prob=0.25,fu_time=450,t.beta=0,t.gam=0,t.alpha=0.0001,t.omega=0.01)
log.rr <- log(mean(res$Y[res$Xi==1]) / mean(res$Y[res$Xi==0]))
log.rr
```

```
## [1] 0.01481509
```

```
res<-sim.nc.clusters.ef3(nc=500,hh_size=4,tx_prob=0.5,fu_time=450,t.beta=0,t.gam=0,t.alpha=0.0001,t.omega=0.01)
log.rr <- log(mean(res$Y[res$Xi==1]) / mean(res$Y[res$Xi==0]))
log.rr
```

```
## [1] 0.05406722
```

```
res<-sim.nc.clusters.ef3(nc=500,hh_size=4,tx_prob=0.75,fu_time=450,t.beta=0,t.gam=0,t.alpha=0.0001,t.omega=0.01)
log.rr <- log(mean(res$Y[res$Xi==1]) / mean(res$Y[res$Xi==0]))
log.rr
```

```
## [1] 0.05781957
```

**Supplement Figure 4: Constant cluster size (4 subjects in each cluster), constant observation time, no infections at baseline, simple Bernoulli randomized distribution of covariate x with  $\Pr(x=1)=0.25$ ,  $\Pr(x=1)=0.5$  and  $\Pr(x=1)=0.75$ .**

```
res<-sim.nc.clusters.ef4(nc=500,hh_size=4,tx_prob=0.25,fu_time=450,t.beta=0,t.gam=0,t.alpha=0.0001,t.omega=0.01)
log.rr <- log(mean(res$Y[res$Xi==1]) / mean(res$Y[res$Xi==0]))
log.rr
```

```
## [1] -0.1149087
```

```
res<-sim.nc.clusters.ef4(nc=500,hh_size=4,tx_prob=0.5,fu_time=450,t.beta=0,t.gam=0,t.alpha=0.0001,t.omega=0.01)
log.rr <- log(mean(res$Y[res$Xi==1]) / mean(res$Y[res$Xi==0]))
log.rr
```

```
## [1] 0.0441313
```

```
res<-sim.nc.clusters.ef4(nc=500,hh_size=4,tx_prob=0.75,fu_time=450,t.beta=0,t.gam=0,t.alpha=0.0001,t.omega=0.01)
log.rr <- log(mean(res$Y[res$Xi==1]) / mean(res$Y[res$Xi==0]))
log.rr
```

```
## [1] 0.03017088
```

**Supplement Figure 5: Constant cluster size (4 subjects in each cluster), constant observation time, no infections at baseline, cluster randomized distribution of covariate x with  $p=0.25$ ,  $p=0.5$ ,  $p=0.75$  (corresponds to Figure 5 in the paper).**

```
res<-sim.nc.clusters.ef5(nc=500,hh_size=4,tx_prob=0.25,fu_time=450,t.beta=0,t.gam=0,t.alpha=0.0001,t.omega=0.01)
log.rr <- log(mean(res$Y[res$Xi==1]) / mean(res$Y[res$Xi==0]))
log.rr
```

```
## [1] -0.2958454
```

```
res<-sim.nc.clusters.ef5(nc=500,hh_size=4,tx_prob=0.5,fu_time=450,t.beta=0,t.gam=0,t.alpha=0.0001,t.omega=0.01)
log.rr <- log(mean(res$Y[res$Xi==1]) / mean(res$Y[res$Xi==0]))
log.rr
```

```
## [1] 0.04652002
```

```
res<-sim.nc.clusters.ef5(nc=500,hh_size=4,tx_prob=0.75,fu_time=450,t.beta=0,t.gam=0,t.alpha=0.0001,t.omega=0.01)
log.rr <- log(mean(res$Y[res$Xi==1]) / mean(res$Y[res$Xi==0]))
log.rr
```

```
## [1] -0.425874
```

## 4.2.2. Variable cluster size under different distributions of covariate x

**Supplement Figure 6: Variable cluster size (Poisson distributed), constant observation time, no infections at baseline, block randomized distribution of covariate x with k=1 (corresponds to Figure 6 in the paper).**

```
res<-sim.nc.clusters.ef6(nc=500,hh_size=2,fu_time=750,t.beta=0,t.gam=0,t.alpha=0.0001,t.omega=0.01)
log.rr <- log(mean(res$Y[res$Xi==1]) / mean(res$Y[res$Xi==0]))
log.rr
```

```
## [1] -0.4218162
```

```
res<-sim.nc.clusters.ef6(nc=500,hh_size=3,fu_time=525,t.beta=0,t.gam=0,t.alpha=0.0001,t.omega=0.01)
log.rr <- log(mean(res$Y[res$Xi==1]) / mean(res$Y[res$Xi==0]))
log.rr
```

```
## [1] -0.1350039
```

```
res<-sim.nc.clusters.ef6(nc=500,hh_size=4,fu_time=450,t.beta=0,t.gam=0,t.alpha=0.0001,t.omega=0.01)
log.rr <- log(mean(res$Y[res$Xi==1]) / mean(res$Y[res$Xi==0]))
log.rr
```

```
## [1] -0.1756788
```

```
res<-sim.nc.clusters.ef6(nc=500,hh_size=5,fu_time=330,t.beta=0,t.gam=0,t.alpha=0.0001,t.omega=0.01)
log.rr <- log(mean(res$Y[res$Xi==1]) / mean(res$Y[res$Xi==0]))
log.rr
```

```
## [1] -0.2687586
```

**Supplement Figure 7: Variable cluster size (Poisson distributed), constant observation time, no infections at baseline, block randomized distribution of covariate x with half of subjects per cluster having x=1 (corresponds to Figure 7 in the paper).**

```
res<-sim.nc.clusters.ef7(nc=500,hh_size=2,tx_prob=0.5,fu_time=750,t.beta=0,t.gam=0,t.alpha=0.0001,t.omega=0.01)
log.rr <- log(mean(res$Y[res$Xi==1]) / mean(res$Y[res$Xi==0]))
log.rr
```

```
## [1] 0.3220224
```

```
res<-sim.nc.clusters.ef7(nc=500,hh_size=3,tx_prob=0.5,fu_time=525,t.beta=0,t.gam=0,t.alpha=0.0001,t.omega=0.01)
log.rr <- log(mean(res$Y[res$Xi==1]) / mean(res$Y[res$Xi==0]))
log.rr
```

```
## [1] -0.01249816
```

```
res<-sim.nc.clusters.ef7(nc=500,hh_size=4,tx_prob=0.5,fu_time=450,t.beta=0,t.gam=0,t.alpha=0.0001,t.omega=0.01)
log.rr <- log(mean(res$Y[res$Xi==1]) / mean(res$Y[res$Xi==0]))
log.rr
```

```
## [1] 0.03613971
```

```
res<-sim.nc.clusters.ef7(nc=500,hh_size=5,tx_prob=0.5,fu_time=330,t.beta=0,t.gam=0,t.alpha=0.0001,t.omega=0.01)
log.rr <- log(mean(res$Y[res$Xi==1]) / mean(res$Y[res$Xi==0]))
log.rr
```

```
## [1] 0.02868321
```

**Supplement Figure 8: Variable cluster size (Poisson distributed), constant observation time, no infections at baseline, simple Bernoulli randomized distribution of covariate x with  $\Pr(x=1)=0.5$ .**

```
res<-sim.nc.clusters.ef8(nc=500,hh_size=2,tx_prob=0.5,fu_time=750,t.beta=0,t.gam=0,t.alpha=0.0001,t.omega=0.01)
log.rr <- log(mean(res$Y[res$Xi==1]) / mean(res$Y[res$Xi==0]))
log.rr
```

```
## [1] 0.2492964
```

```
res<-sim.nc.clusters.ef8(nc=500,hh_size=3,tx_prob=0.5,fu_time=525,t.beta=0,t.gam=0,t.alpha=0.0001,t.omega=0.01)
log.rr <- log(mean(res$Y[res$Xi==1]) / mean(res$Y[res$Xi==0]))
log.rr
```

```
## [1] -0.07500167
```

```
res<-sim.nc.clusters.ef8(nc=500,hh_size=4,tx_prob=0.5,fu_time=450,t.beta=0,t.gam=0,t.alpha=0.0001,t.omega=0.01)
log.rr <- log(mean(res$Y[res$Xi==1]) / mean(res$Y[res$Xi==0]))
log.rr
```

```
## [1] -0.1263711
```

```
res<-sim.nc.clusters.ef8(nc=500,hh_size=5,tx_prob=0.5,fu_time=330,t.beta=0,t.gam=0,t.alpha=0.0001,t.omega=0.01)
log.rr <- log(mean(res$Y[res$Xi==1]) / mean(res$Y[res$Xi==0]))
log.rr
```

```
## [1] 0.01170061
```

### Supplement Figure 9: Variable cluster size (Poisson distributed), constant observation time, no infections at baseline, cluster randomized distribution of covariate x with $p=0.5$ .

```
res<-sim.nc.clusters.ef9(nc=500,hh_size=2,tx_prob=0.5,fu_time=750,t.beta=0,t.gam=0,t.alpha=0.0001,t.omega=0.01)
log.rr <- log(mean(res$Y[res$Xi==1]) / mean(res$Y[res$Xi==0]))
log.rr
```

```
## [1] -0.7693637
```

```
res<-sim.nc.clusters.ef9(nc=500,hh_size=3,tx_prob=0.5,fu_time=525,t.beta=0,t.gam=0,t.alpha=0.0001,t.omega=0.01)
log.rr <- log(mean(res$Y[res$Xi==1]) / mean(res$Y[res$Xi==0]))
log.rr
```

```
## [1] -0.253412
```

```
res<-sim.nc.clusters.ef9(nc=500,hh_size=4,tx_prob=0.5,fu_time=450,t.beta=0,t.gam=0,t.alpha=0.0001,t.omega=0.01)
log.rr <- log(mean(res$Y[res$Xi==1]) / mean(res$Y[res$Xi==0]))
log.rr
```

```
## [1] 0.1804806
```

```
res<-sim.nc.clusters.ef9(nc=500,hh_size=5,tx_prob=0.5,fu_time=330,t.beta=0,t.gam=0,t.alpha=0.0001,t.omega=0.01)
log.rr <- log(mean(res$Y[res$Xi==1]) / mean(res$Y[res$Xi==0]))
log.rr
```

```
## [1] -0.1644285
```

### 4.2.3 Duration and variability of observation time $T_i$

Supplement Figure 10: Constant cluster size (4 subjects in each cluster), no infections at baseline, block randomized distribution of covariate x with  $k=2$ . In first three plots observation time is fixed at the values  $T_i=50$ ,  $T_i=450$  and  $T_i=1500$ ; and these three plots are generated using the function 'sim.nc.clusters.ef3'. The fourth plot uses variable (exponentially distributed) observation time with a mean of 450. The fourth plot is generated using the function 'sim.nc.clusters.ef10'.

```
res<-sim.nc.clusters.ef3(nc=500,hh_size=4,tx_prob=0.5,fu_time=50,t.beta=0,t.gam=0,t.alpha=0.0001,t.omega=0.01)
log.rr <- log(mean(res$Y[res$Xi==1]) / mean(res$Y[res$Xi==0]))
log.rr
```

```
## [1] 0.1541507
```

```
res<-sim.nc.clusters.ef3(nc=500,hh_size=4,tx_prob=0.5,fu_time=450,t.beta=0,t.gam=0,t.alpha=0.0001,t.omega=0.01)
log.rr <- log(mean(res$Y[res$Xi==1]) / mean(res$Y[res$Xi==0]))
log.rr
```

```
## [1] 0.05244648
```

```
res<-sim.nc.clusters.ef3(nc=500,hh_size=4,tx_prob=0.5,fu_time=1500,t.beta=0,t.gam=0,t.alpha=0.0001,t.omega=0.01)
log.rr <- log(mean(res$Y[res$Xi==1]) / mean(res$Y[res$Xi==0]))
log.rr
```

```
## [1] 0.002333723
```

```
res<-sim.nc.clusters.ef10(nc=500,hh_size=4,tx_prob=0.5,fu_time=450,t.beta=0,t.gam=0,t.alpha=0.0001,t.omega=0.01)
log.rr <- log(mean(res$Y[res$Xi==1]) / mean(res$Y[res$Xi==0]))
log.rr
```

```
## [1] 0
```

**Supplement Figure 11: Variable cluster size (Poisson distributed), no infections at baseline, simple Bernoulli randomized distribution of covariate x with  $\Pr(x=1)=0.5$ . In first three plots observation time is fixed at the values  $T_i=50$ ,  $T_i=450$  and  $T_i=1500$ ; and these three plots are generated using the function 'sim.nc.clusters.ef8'. The fourth plot uses variable (exponentially distributed) observation time with a mean of 450. The fourth plot is generated using the function 'sim.nc.clusters.ef11'.**

```
res<-sim.nc.clusters.ef8(nc=500,hh_size=4,tx_prob=0.5,fu_time=50,t.beta=0,t.gam=0,t.alpha=0.0001,t.omega=0.01)
log.rr <- log(mean(res$Y[res$Xi==1]) / mean(res$Y[res$Xi==0]))
log.rr
```

```
## [1] 0.8008208
```

```
res<-sim.nc.clusters.ef8(nc=500,hh_size=4,tx_prob=0.5,fu_time=450,t.beta=0,t.gam=0,t.alpha=0.0001,t.omega=0.01)
log.rr <- log(mean(res$Y[res$Xi==1]) / mean(res$Y[res$Xi==0]))
log.rr
```

```
## [1] 0.05236446
```

```
res<-sim.nc.clusters.ef8(nc=500,hh_size=4,tx_prob=0.5,fu_time=1500,t.beta=0,t.gam=0,t.alpha=0.0001,t.omega=0.01)
log.rr <- log(mean(res$Y[res$Xi==1]) / mean(res$Y[res$Xi==0]))
log.rr
```

```
## [1] 0.01417008
```

```
res<-sim.nc.clusters.ef11(nc=500,hh_size=4,tx_prob=0.5,fu_time=450,t.beta=0,t.gam=0,t.alpha=0.0001,t.omega=0.01)
log.rr <- log(mean(res$Y[res$Xi==1]) / mean(res$Y[res$Xi==0]))
log.rr
```

```
## [1] 0.1640715
```

**Supplement Figure 12: Constant cluster size (4 subjects in each cluster), no infections at baseline, cluster randomized distribution of covariate x with  $p=0.5$ . In first three plots observation time is fixed at the values  $T_i=50$ ,  $T_i=450$  and  $T_i=1500$ ; and these three plots are generated using the function 'sim.nc.clusters.ef5'. The fourth plot uses variable (exponentially distributed) observation time with a mean of 450. The fourth plot is generated using the function 'sim.nc.clusters.ef12'.**

```
res<-sim.nc.clusters.ef5(nc=500,hh_size=4,tx_prob=0.5,fu_time=50,t.beta=0,t.gam=0,t.alpha=0.0001,t.omega=0.01)
log.rr <- log(mean(res$Y[res$Xi==1]) / mean(res$Y[res$Xi==0]))
log.rr
```

```
## [1] 0.6931472
```

```
res<-sim.nc.clusters.ef5(nc=500,hh_size=4,tx_prob=0.5,fu_time=450,t.beta=0,t.gam=0,t.alpha=0.0001,t.omega=0.01)
log.rr <- log(mean(res$Y[res$Xi==1]) / mean(res$Y[res$Xi==0]))
log.rr
```

```
## [1] 0.3262969
```

```
res<-sim.nc.clusters.ef5(nc=500,hh_size=4,tx_prob=0.5,fu_time=1500,t.beta=0,t.gam=0,t.alpha=0.0001,t.omega=0.01)
log.rr <- log(mean(res$Y[res$Xi==1]) / mean(res$Y[res$Xi==0]))
log.rr
```

```
## [1] -0.07267119
```

```
res<-sim.nc.clusters.ef12(nc=500,hh_size=4,tx_prob=0.5,fu_time=450,t.beta=0,t.gam=0,t.alpha=0.0001,t.omega=0.01)
log.rr <- log(mean(res$Y[res$Xi==1]) / mean(res$Y[res$Xi==0]))
log.rr
```

```
## [1] 0.01360565
```

## 4.2.4 Infections at time zero

**Supplement Figures 13 and 14: Constant cluster size (4 subjects in each cluster), constant observation time, block randomized distribution of covariate x with  $k=2$ . Conditional probabilities of being infected at baseline:  $\Pr[Y(0)=1|x=1]=p$ ; and  $\Pr[Y(0)=1|X=1]=q$ .**

```
res<-sim.nc.clusters.ef13(nc=500,hh_size=4,tx_prob=0.5,fu_time=450,p=0,q=0,t.beta=0,t.gam=0,t.alpha=0.0001,t.omega=0.01)
res.uninf <- subset(res,Yi0==0)
log.rr <- log(mean(res.uninf$Y[res.uninf$Xi==1]) / mean(res.uninf$Y[res.uninf$Xi==0]))
log.rr
```

```
## [1] 0.02247286
```

```
res<-sim.nc.clusters.ef13(nc=500,hh_size=4,tx_prob=0.5,fu_time=150,p=0,q=0.1,t.beta=0,t.gam=0,t.alpha=0.0001,t.omega=0.01)
res.uninf <- subset(res,Yi0==0)
log.rr <- log(mean(res.uninf$Y[res.uninf$Xi==1]) / mean(res.uninf$Y[res.uninf$Xi==0]))
log.rr
```

```
## [1] 0.5131889
```

```
res<-sim.nc.clusters.ef13(nc=500,hh_size=4,tx_prob=0.5,fu_time=18,p=0,q=0.5,t.beta=0,t.gam=0,t.alpha=0.0001,t.omega=0.01)
res.uninf <- subset(res,Yi0==0)
log.rr <- log(mean(res.uninf$Y[res.uninf$Xi==1]) / mean(res.uninf$Y[res.uninf$Xi==0]))
log.rr
```

```
## [1] 0.5940172
```

```
res<-sim.nc.clusters.ef13(nc=500,hh_size=4,tx_prob=0.5,fu_time=9,p=0,q=0.9,t.beta=0,t.gam=0,t.alpha=0.0001,t.omega=0.01)
res.uninf <- subset(res,Yi0==0)
log.rr <- log(mean(res.uninf$Y[res.uninf$Xi==1]) / mean(res.uninf$Y[res.uninf$Xi==0]))
log.rr
```

```
## [1] 0.5590442
```

```
res<-sim.nc.clusters.ef13(nc=500,hh_size=4,tx_prob=0.5,fu_time=150,p=0.1,q=0,t.beta=0,t.gam=0,t.alpha=0.0001,t.omega=0.01)
res.uninf <- subset(res,Yi0==0)
log.rr <- log(mean(res.uninf$Y[res.uninf$Xi==1]) / mean(res.uninf$Y[res.uninf$Xi==0]))
log.rr
```

```
## [1] -0.5222805
```

```
res<-sim.nc.clusters.ef13(nc=500,hh_size=4,tx_prob=0.5,fu_time=60,p=0.1,q=0.1,t.beta=0,t.gam=0,t.alpha=0.0001,t.omega=0.01)
res.uninf <- subset(res,Yi0==0)
log.rr <- log(mean(res.uninf$Y[res.uninf$Xi==1]) / mean(res.uninf$Y[res.uninf$Xi==0]))
log.rr
```

```
## [1] -0.004405293
```

```
res<-sim.nc.clusters.ef13(nc=500,hh_size=4,tx_prob=0.5,fu_time=16,p=0.1,q=0.5,t.beta=0,t.gam=0,t.alpha=0.0001,t.omega=0.01)
res.uninf <- subset(res,Yi0==0)
log.rr <- log(mean(res.uninf$Y[res.uninf$Xi==1]) / mean(res.uninf$Y[res.uninf$Xi==0]))
log.rr
```

```
## [1] 0.6094989
```

```
res<-sim.nc.clusters.ef13(nc=500,hh_size=4,tx_prob=0.5,fu_time=8,p=0.1,q=0.9,t.beta=0,t.gam=0,t.alpha=0.0001,t.omega=0.01)
res.uninf <- subset(res,Yi0==0)
log.rr <- log(mean(res.uninf$Y[res.uninf$Xi==1]) / mean(res.uninf$Y[res.uninf$Xi==0]))
log.rr
```



```
## [1] 0.6535716
```

```
res<-sim.nc.clusters.ef13(nc=500,hh_size=4,tx_prob=0.5,fu_time=18,p=0.5,q=0,t.beta=0,t.gam=0,t.alpha=0.0001,t.omega=0.01)
res.uninf <- subset(res,Yi0==0)
log.rr <- log(mean(res.uninf$Y[res.uninf$Xi==1]) / mean(res.uninf$Y[res.uninf$Xi==0]))
log.rr
```

```
## [1] -0.5495988
```

```
res<-sim.nc.clusters.ef13(nc=500,hh_size=4,tx_prob=0.5,fu_time=16,p=0.5,q=0.1,t.beta=0,t.gam=0,t.alpha=0.0001,t.omega=0.01)
res.uninf <- subset(res,Yi0==0)
log.rr <- log(mean(res.uninf$Y[res.uninf$Xi==1]) / mean(res.uninf$Y[res.uninf$Xi==0]))
log.rr
```

```
## [1] -0.3226831
```

```
res<-sim.nc.clusters.ef13(nc=500,hh_size=4,tx_prob=0.5,fu_time=11,p=0.5,q=0.5,t.beta=0,t.gam=0,t.alpha=0.0001,t.omega=0.01)
res.uninf <- subset(res,Yi0==0)
log.rr <- log(mean(res.uninf$Y[res.uninf$Xi==1]) / mean(res.uninf$Y[res.uninf$Xi==0]))
log.rr
```

```
## [1] -0.1876387
```

```
res<-sim.nc.clusters.ef13(nc=500,hh_size=4,tx_prob=0.5,fu_time=7,p=0.5,q=0.9,t.beta=0,t.gam=0,t.alpha=0.0001,t.omega=0.01)
res.uninf <- subset(res,Yi0==0)
log.rr <- log(mean(res.uninf$Y[res.uninf$Xi==1]) / mean(res.uninf$Y[res.uninf$Xi==0]))
log.rr
```

```
## [1] -0.03719283
```

```
res<-sim.nc.clusters.ef13(nc=5000,hh_size=4,tx_prob=0.5,fu_time=9,p=0.9,q=0,t.beta=0,t.gam=0,t.alpha=0.0001,t.omega=0.01)
res.uninf <- subset(res,Yi0==0)
log.rr <- log(mean(res.uninf$Y[res.uninf$Xi==1]) / mean(res.uninf$Y[res.uninf$Xi==0]))
log.rr
```

```
## [1] -0.5479994
```

```
res<-sim.nc.clusters.ef13(nc=5000,hh_size=4,tx_prob=0.5,fu_time=8,p=0.9,q=0.1,t.beta=0,t.gam=0,t.alpha=0.0001,t.omega=0.01)
res.uninf <- subset(res,Yi0==0)
log.rr <- log(mean(res.uninf$Y[res.uninf$Xi==1]) / mean(res.uninf$Y[res.uninf$Xi==0]))
log.rr
```

```
## [1] -0.5519346
```

```
res<-sim.nc.clusters.ef13(nc=500,hh_size=4,tx_prob=0.5,fu_time=7,p=0.9,q=0.5,t.beta=0,t.gam=0,t.alpha=0.0001,t.omega=0.01)
res.uninf <- subset(res,Yi0==0)
log.rr <- log(mean(res.uninf$Y[res.uninf$Xi==1]) / mean(res.uninf$Y[res.uninf$Xi==0]))
log.rr
```

```
## [1] -0.133169
```

```
res<-sim.nc.clusters.ef13(nc=500,hh_size=4,tx_prob=0.5,fu_time=5,p=0.9,q=0.9,t.beta=0,t.gam=0,t.alpha=0.0001,t.omega=0.01)
res.uninf <- subset(res,Yi0==0)
log.rr <- log(mean(res.uninf$Y[res.uninf$Xi==1]) / mean(res.uninf$Y[res.uninf$Xi==0]))
log.rr
```

```
## [1] 0.6690496
```

**Supplement Figures 15 and 16: Variable cluster size (Poisson distributed), constant observation time, simple Bernoulli randomized distribution of covariate x with  $\Pr(x=1)=0.5$ . Conditional probabilities of being infected at baseline:  $\Pr[Y(0)=1|x=1]=p$ ; and  $\Pr[Y(0)=1|X=1]=q$ .**

```
res<-sim.nc.clusters.ef15(nc=500,hh_size=4,tx_prob=0.5,fu_time=450,p=0,q=0,t.beta=0,t.gam=0,t.alpha=0.0001,t.omega=0.01)
res.uninf <- subset(res,Yi0==0)
log.rr <- log(mean(res.uninf$Y[res.uninf$Xi==1]) / mean(res.uninf$Y[res.uninf$Xi==0]))
log.rr
```

```
## [1] -0.0480066
```

```
res<-sim.nc.clusters.ef15(nc=500,hh_size=4,tx_prob=0.5,fu_time=150,p=0,q=0.1,t.beta=0,t.gam=0,t.alpha=0.0001,t.omega=0.01)
res.uninf <- subset(res,Yi0==0)
log.rr <- log(mean(res.uninf$Y[res.uninf$Xi==1]) / mean(res.uninf$Y[res.uninf$Xi==0]))
log.rr
```

```
## [1] -0.05323764
```

```
res<-sim.nc.clusters.ef15(nc=500,hh_size=4,tx_prob=0.5,fu_time=18,p=0,q=0.5,t.beta=0,t.gam=0,t.alpha=0.0001,t.omega=0.01)
res.uninf <- subset(res,Yi0==0)
log.rr <- log(mean(res.uninf$Y[res.uninf$Xi==1]) / mean(res.uninf$Y[res.uninf$Xi==0]))
log.rr
```

```
## [1] 0.06740993
```

```
res<-sim.nc.clusters.ef15(nc=500,hh_size=4,tx_prob=0.5,fu_time=9,p=0,q=0.9,t.beta=0,t.gam=0,t.alpha=0.0001,t.omega=0.01)
res.uninf <- subset(res,Yi0==0)
log.rr <- log(mean(res.uninf$Y[res.uninf$Xi==1]) / mean(res.uninf$Y[res.uninf$Xi==0]))
log.rr
```

```
## [1] 0.3814465
```

```
res<-sim.nc.clusters.ef15(nc=500,hh_size=4,tx_prob=0.5,fu_time=150,p=0.1,q=0,t.beta=0,t.gam=0,t.alpha=0.0001,t.omega=0.01)
res.uninf <- subset(res,Yi0==0)
log.rr <- log(mean(res.uninf$Y[res.uninf$Xi==1]) / mean(res.uninf$Y[res.uninf$Xi==0]))
log.rr
```

```
## [1] 0.08687489
```

```
res<-sim.nc.clusters.ef15(nc=500,hh_size=4,tx_prob=0.5,fu_time=60,p=0.1,q=0.1,t.beta=0,t.gam=0,t.alpha=0.0001,t.omega=0.01)
res.uninf <- subset(res,Yi0==0)
log.rr <- log(mean(res.uninf$Y[res.uninf$Xi==1]) / mean(res.uninf$Y[res.uninf$Xi==0]))
log.rr
```

```
## [1] 0.02960138
```

```
res<-sim.nc.clusters.ef15(nc=500,hh_size=4,tx_prob=0.5,fu_time=16, p=0.1,q=0.5,t.beta=0,t.gam=0,t.alpha=0.0001,t.omega=0.01)
)
res.uninf <- subset(res,Yi0==0)
log.rr <- log(mean(res.uninf$Y[res.uninf$Xi==1]) / mean(res.uninf$Y[res.uninf$Xi==0]))
log.rr
```

```
## [1] -0.01392258
```

```
res<-sim.nc.clusters.ef15(nc=500,hh_size=4,tx_prob=0.5,fu_time=8,p=0.1,q=0.9,t.beta=0,t.gam=0,t.alpha=0.0001,t.omega=0.01)
res.uninf <- subset(res,Yi0==0)
log.rr <- log(mean(res.uninf$Y[res.uninf$Xi==1]) / mean(res.uninf$Y[res.uninf$Xi==0]))
log.rr
```

```
## [1] -0.02240341
```

```
res<-sim.nc.clusters.ef15(nc=5000,hh_size=4,tx_prob=0.5,fu_time=18,p=0.5,q=0,t.beta=0,t.gam=0,t.alpha=0.0001,t.omega=0.01)
res.uninf <- subset(res,Yi0==0)
log.rr <- log(mean(res.uninf$Y[res.uninf$Xi==1]) / mean(res.uninf$Y[res.uninf$Xi==0]))
log.rr
```

```
## [1] -0.02027824
```

```
res<-sim.nc.clusters.ef15(nc=500,hh_size=4,tx_prob=0.5,fu_time=16,p=0.5,q=0.1,t.beta=0,t.gam=0,t.alpha=0.0001,t.omega=0.01)
res.uninf <- subset(res,Yi0==0)
log.rr <- log(mean(res.uninf$Y[res.uninf$Xi==1]) / mean(res.uninf$Y[res.uninf$Xi==0]))
log.rr
```

```
## [1] -0.1100009
```

```
res<-sim.nc.clusters.ef15(nc=500,hh_size=4,tx_prob=0.5,fu_time=11,p=0.5,q=0.5,t.beta=0,t.gam=0,t.alpha=0.0001,t.omega=0.01)
res.uninf <- subset(res,Yi0==0)
log.rr <- log(mean(res.uninf$Y[res.uninf$Xi==1]) / mean(res.uninf$Y[res.uninf$Xi==0]))
log.rr
```

```
## [1] 0.04434493
```

```
res<-sim.nc.clusters.ef15(nc=500,hh_size=4,tx_prob=0.5,fu_time=7,p=0.5,q=0.9,t.beta=0,t.gam=0,t.alpha=0.0001,t.omega=0.01)
res.uninf <- subset(res,Yi0==0)
log.rr <- log(mean(res.uninf$Y[res.uninf$Xi==1]) / mean(res.uninf$Y[res.uninf$Xi==0]))
log.rr
```

```
## [1] -0.1709538
```

```
res<-sim.nc.clusters.ef15(nc=5000,hh_size=4,tx_prob=0.5,fu_time=9,p=0.9,q=0,t.beta=0,t.gam=0,t.alpha=0.0001,t.omega=0.01)
res.uninf <- subset(res,Yi0==0)
log.rr <- log(mean(res.uninf$Y[res.uninf$Xi==1]) / mean(res.uninf$Y[res.uninf$Xi==0]))
log.rr
```

```
## [1] -0.01722264
```

```
res<-sim.nc.clusters.ef15(nc=1000,hh_size=4,tx_prob=0.5,fu_time=8,p=0.9,q=0.1,t.beta=0,t.gam=0,t.alpha=0.0001,t.omega=0.01)
res.uninf <- subset(res,Yi0==0)
log.rr <- log(mean(res.uninf$Y[res.uninf$Xi==1]) / mean(res.uninf$Y[res.uninf$Xi==0]))
log.rr
```

```
## [1] -0.2352435
```

```
res<-sim.nc.clusters.ef15(nc=500,hh_size=4,tx_prob=0.5,fu_time=7,p=0.9,q=0.5,t.beta=0,t.gam=0,t.alpha=0.0001,t.omega=0.01)
res.uninf <- subset(res,Yi0==0)
log.rr <- log(mean(res.uninf$Y[res.uninf$Xi==1]) / mean(res.uninf$Y[res.uninf$Xi==0]))
log.rr
```

```
## [1] -0.1853396
```

```
res<-sim.nc.clusters.ef15(nc=500,hh_size=4,tx_prob=0.5,fu_time=5,p=0.9,q=0.9,t.beta=0,t.gam=0,t.alpha=0.0001,t.omega=0.01)
res.uninf <- subset(res,Yi0==0)
log.rr <- log(mean(res.uninf$Y[res.uninf$Xi==1]) / mean(res.uninf$Y[res.uninf$Xi==0]))
log.rr
```

```
## [1] -0.1106656
```

**Supplement Figure 17: Constant cluster size (4 subjects in each cluster), constant observation time, block randomized distribution of covariate x with k=2. Clusters are selected based on having at least one infection at “baseline”, which are obtained by simulating the infection transmission on the larger number of clusters using the function ‘sim.nc.clusters.ef3’.**

```

res<-sim.nc.clusters.ef3(nc=16722,hh_size=4,tx_prob=0.5,fu_time=75,t.beta=0,t.gam=0,t.alpha=0.0001,t.omega=0.01)
a <- aggregate(res$Y, by=list(HHid=res$HHid), FUN=sum)
bl.inf <- which(a$x>0)
res.bl.inf <- subset(res, HHid %in% bl.inf)
res.bl.inf.split <- split.data.frame(res.bl.inf, as.factor(res.bl.inf$HHid))
dres <- list()
for (l in 1:length(bl.inf)){
cur.hh <- res.bl.inf.split[[l]]
cur.bl.inf <- which(cur.hh$Y==1)
if (length(cur.bl.inf)==1) {k <- cur.bl.inf} else {k <- sample(cur.bl.inf, 1)}
index <- rep(0,length(cur.hh$Xi))
index[k] <- 1
Y.end<-sim.one.cluster(Xi=cur.hh$Xi,Yi0=cur.hh$Y,Ti=10,t.beta=0,t.gam=0,t.alpha=0.0001, t.omega=0.01)
dres[[l]]<-data.frame(HHid=cur.hh$HHid,Ti1=cur.hh$Ti,index=index,Ti2=10,Xi=cur.hh$Xi,Yi0=cur.hh$Y,Y.end=Y.end)
}
dres <- bind_rows(dres)
dres.noindex <- subset(dres, index==0)
dres.uninf <- subset(dres, Yi0==0)
log.rr.noindex <- log(mean(dres.noindex$Y.end[dres.noindex$Xi==1]) / mean(dres.noindex$Y.end[dres.noindex$Xi==0]))
log.rr.uninf <- log(mean(dres.uninf$Y.end[dres.uninf$Xi==1]) / mean(dres.uninf$Y.end[dres.uninf$Xi==0]))

```

```
log.rr.noindex
```

```
## [1] -0.01519296
```

```
log.rr.uninf
```

```
## [1] -0.03005147
```

**Supplement Figure 18: Variable cluster size (Poisson distributed), constant observation time, simple Bernoulli randomized distribution of covariate  $x$  with  $\Pr(x=1)=0.5$ . Clusters are selected based on having at least one infection at “baseline”, which are obtained by simulating the infection transmission on the larger number of clusters using the function ‘sim.nc.clusters.ef18’.**

```

res<-sim.nc.clusters.ef18(nc=8571,hh_size=4,tx_prob=0.5,fu_time=150,t.beta=0,t.gam=0,t.alpha=0.0001,t.omega=0.01)
a <- aggregate(res$Y, by=list(HHid=res$HHid), FUN=sum)
bl.inf <- which(a$x>0)
res.bl.inf <- subset(res, HHid %in% bl.inf)
res.bl.inf.split <- split.data.frame(res.bl.inf, as.factor(res.bl.inf$HHid))
dres <- list()
for (l in 1:length(bl.inf)){
cur.hh <- res.bl.inf.split[[l]]
cur.bl.inf <- which(cur.hh$Y==1)
if (length(cur.bl.inf)==1) {k <- cur.bl.inf} else {k <- sample(cur.bl.inf, 1)}
index <- rep(0,length(cur.hh$Xi))
index[k] <- 1
Y.end<-sim.one.cluster(Xi=cur.hh$Xi,Yi0=cur.hh$Y,Ti=10,t.beta=0,t.gam=0,t.alpha=0.0001, t.omega=0.01)
dres[[l]]<-data.frame(HHid=cur.hh$HHid,Ti1=cur.hh$Ti, index=index,Ti2=10,Xi=cur.hh$Xi,Yi0=cur.hh$Y,Y.end=Y.end)
}
dres <- bind_rows(dres)
dres.noindex <- subset(dres, index==0)
dres.uninf <- subset(dres, Yi0==0)
log.rr.noindex <- log(mean(dres.noindex$Y.end[dres.noindex$Xi==1]) / mean(dres.noindex$Y.end[dres.noindex$Xi==0]))
log.rr.uninf <- log(mean(dres.uninf$Y.end[dres.uninf$Xi==1]) / mean(dres.uninf$Y.end[dres.uninf$Xi==0]))

```

```
log.rr.noindex
```

```
## [1] -0.02538892
```

```
log.rr.uninf
```

```
## [1] -0.1846947
```

## 4.2.5 Ratio $\omega/\alpha$

**Supplement Figure 19: Constant cluster size (4 subjects in each cluster), constant observation time, no infections at baseline, block randomized distribution of covariate  $x$  with  $k=2$ . All three plots in this figure are generated using the function 'sim.nc.clusters.ef3' with different values of  $\omega$ ,  $\alpha$  and observation time  $T_i$ .**

```

res<-sim.nc.clusters.ef3(nc=500,hh_size=4,tx_prob=0.5,fu_time=450,t.beta=0,t.gam=0,t.alpha=0.0001,t.omega=0.01)
log.rr <- log(mean(res$Y[res$Xi==1]) / mean(res$Y[res$Xi==0]))
log.rr

```

```
## [1] 0.03460553
```

```

res<-sim.nc.clusters.ef3(nc=500,hh_size=4,tx_prob=0.5,fu_time=750,t.beta=0,t.gam=0,t.alpha=0.0001,t.omega=0.001)
log.rr <- log(mean(res$Y[res$Xi==1]) / mean(res$Y[res$Xi==0]))
log.rr

```

```
## [1] 0.05644131
```

```
res<-sim.nc.clusters.ef3(nc=500,hh_size=4,tx_prob=0.5,fu_time=75,t.beta=0,t.gam=0,t.alpha=0.001,t.omega=0.01)
log.rr <- log(mean(res$Y[res$Xi==1]) / mean(res$Y[res$Xi==0]))
log.rr
```

```
## [1] -0.1170566
```

**Supplement Figure 20: Variable cluster size (Poisson distributed), constant observation time, no infections at baseline, simple Bernoulli randomized distribution of covariate x with  $\Pr(x=1)=0.5$ . All three plots in this figure are generated using the function 'sim.nc.clusters.ef8' with different values of  $\omega$ ,  $\alpha$  and observation time  $T_i$ .**

```
res<-sim.nc.clusters.ef8(nc=500,hh_size=4,tx_prob=0.5,fu_time=450,t.beta=0,t.gam=0,t.alpha=0.0001,t.omega=0.01)
log.rr <- log(mean(res$Y[res$Xi==1]) / mean(res$Y[res$Xi==0]))
log.rr
```

```
## [1] -0.06623484
```

```
res<-sim.nc.clusters.ef8(nc=500,hh_size=4,tx_prob=0.5,fu_time=750,t.beta=0,t.gam=0,t.alpha=0.0001,t.omega=0.001)
log.rr <- log(mean(res$Y[res$Xi==1]) / mean(res$Y[res$Xi==0]))
log.rr
```

```
## [1] -0.03244636
```

```
res<-sim.nc.clusters.ef8(nc=500,hh_size=4,tx_prob=0.5,fu_time=75,t.beta=0,t.gam=0,t.alpha=0.001,t.omega=0.01)
log.rr <- log(mean(res$Y[res$Xi==1]) / mean(res$Y[res$Xi==0]))
log.rr
```

```
## [1] 0.02442996
```

**Supplement Figure 21: Variable cluster size (Poisson distributed), constant observation time, no infections at baseline, block randomized distribution of covariate x with  $k=1$ . All five plots in this figure are generated using the function 'sim.nc.clusters.ef6' with different values of  $\omega$ ,  $\alpha$  and observation time  $T_i$ .**

```
res<-sim.nc.clusters.ef6(nc=500,hh_size=4,fu_time=3600,t.beta=0,t.gam=0,t.alpha=0.00001,t.omega=0.01)
log.rr <- log(mean(res$Y[res$Xi==1]) / mean(res$Y[res$Xi==0]))
log.rr
```

```
## [1] -0.2325195
```

```
res<-sim.nc.clusters.ef6(nc=500,hh_size=4,fu_time=450,t.beta=0,t.gam=0,t.alpha=0.0001,t.omega=0.01)
log.rr <- log(mean(res$Y[res$Xi==1]) / mean(res$Y[res$Xi==0]))
log.rr
```

```
## [1] -0.2239663
```

```
res<-sim.nc.clusters.ef6(nc=500,hh_size=4,fu_time=750,t.beta=0,t.gam=0,t.alpha=0.0001,t.omega=0.001)
log.rr <- log(mean(res$Y[res$Xi==1]) / mean(res$Y[res$Xi==0]))
log.rr
```

```
## [1] -0.2806185
```

```
res<-sim.nc.clusters.ef6(nc=500,hh_size=4,fu_time=130,t.beta=0,t.gam=0,t.alpha=0.001,t.omega=0.001)
log.rr <- log(mean(res$Y[res$Xi==1]) / mean(res$Y[res$Xi==0]))
log.rr
```

```
## [1] -0.145079
```

```
res<-sim.nc.clusters.ef6(nc=500,hh_size=4,fu_time=160,t.beta=0,t.gam=0,t.alpha=0.001,t.omega=0.0001)
log.rr <- log(mean(res$Y[res$Xi==1]) / mean(res$Y[res$Xi==0]))
log.rr
```

```
## [1] -0.008620743
```

**Supplement Figure 22: Variable cluster size (Poisson distributed), constant observation time, no infections at baseline, cluster randomized distribution of covariate x with  $p=0.5$ . All five plots in this figure are generated using the function 'sim.nc.clusters.ef9' with different values of  $\omega$ ,  $\alpha$  and observation time  $T_i$ .**

```
res<-sim.nc.clusters.ef9(nc=500,hh_size=4,tx_prob=0.5,fu_time=3600,t.beta=0,t.gam=0,t.alpha=0.00001,t.omega=0.01)
log.rr <- log(mean(res$Y[res$Xi==1]) / mean(res$Y[res$Xi==0]))
log.rr
```

```
## [1] -0.1519638
```

```
res<-sim.nc.clusters.ef9(nc=500,hh_size=4,tx_prob=0.5,fu_time=450,t.beta=0,t.gam=0,t.alpha=0.0001,t.omega=0.01)
log.rr <- log(mean(res$Y[res$Xi==1]) / mean(res$Y[res$Xi==0]))
log.rr
```

```
## [1] 0.2719212
```

```
res<-sim.nc.clusters.ef9(nc=500,hh_size=4,tx_prob=0.5,fu_time=750,t.beta=0,t.gam=0,t.alpha=0.0001,t.omega=0.001)
log.rr <- log(mean(res$Y[res$Xi==1]) / mean(res$Y[res$Xi==0]))
log.rr
```

```
## [1] -0.1282791
```

```
res<-sim.nc.clusters.ef9(nc=500,hh_size=4,tx_prob=0.5,fu_time=130,t.beta=0,t.gam=0,t.alpha=0.001,t.omega=0.001)
log.rr <- log(mean(res$Y[res$Xi==1]) / mean(res$Y[res$Xi==0]))
log.rr
```



```
## [1] -0.2313543
```

```
res<-sim.nc.clusters.ef9(nc=500, hh_size=4, tx_prob=0.5, fu_time=160, t.beta=0, t.gam=0, t.alpha=0.001, t.omega=0.0001)  
log.rr <- log(mean(res$Y[res$Xi==1]) / mean(res$Y[res$Xi==0]))  
log.rr
```

```
## [1] -0.07895505
```
